# Supplementary material for: CRISPR/Cas9-mediated CysLT1R deletion reverses synaptic failure, amyloidosis and cognitive impairment in APP/PS1 mice
Source: publisher site journal article supplement (doi:10.18632/aging.202501), 2021-02-11
Supplement: Supplementary file [file aging-v13i5-202501-supplementary-material-SD1.pdf]

SUPPLEMENTARY FIGURES

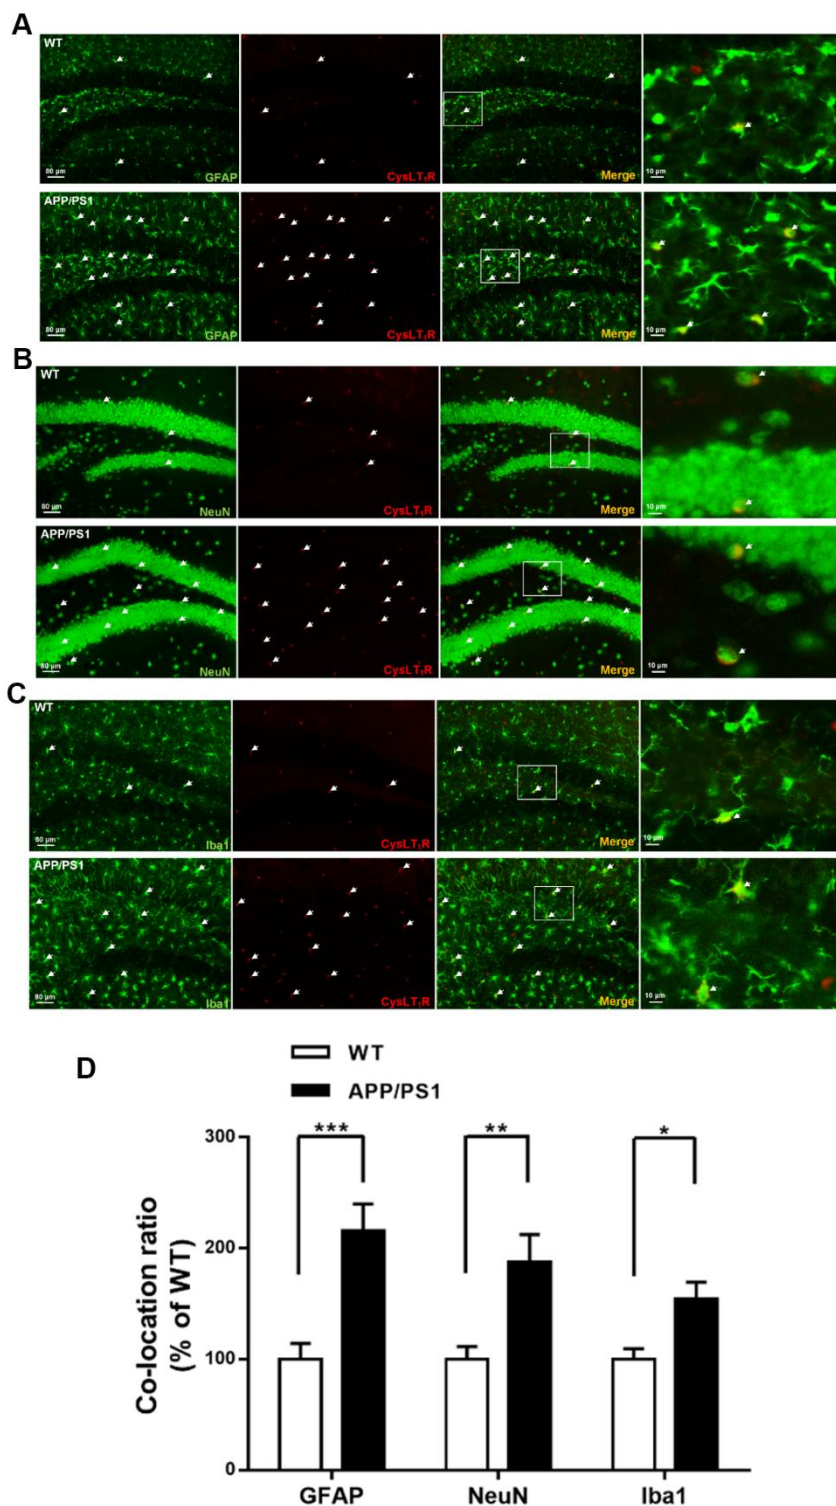

**Supplementary Figure 1.** CysLT<sub>1</sub>R expression is upregulated in different cells of the brains from APP/PS1 mice. (A–C) CysLT<sub>1</sub>R expression in neuron, astrocyte and microglia of the hippocampal DG in APP/PS1 mice and littermate control at the age of 10 months. Scale bar, 50 μm. (D) Quantification of CysLT<sub>1</sub>R in the brain sections of mice. Values are mean ± SEM, n = 4, \**P*<0.05, \*\**P*<0.01, \*\*\**P*<0.001 vs. WT mice.

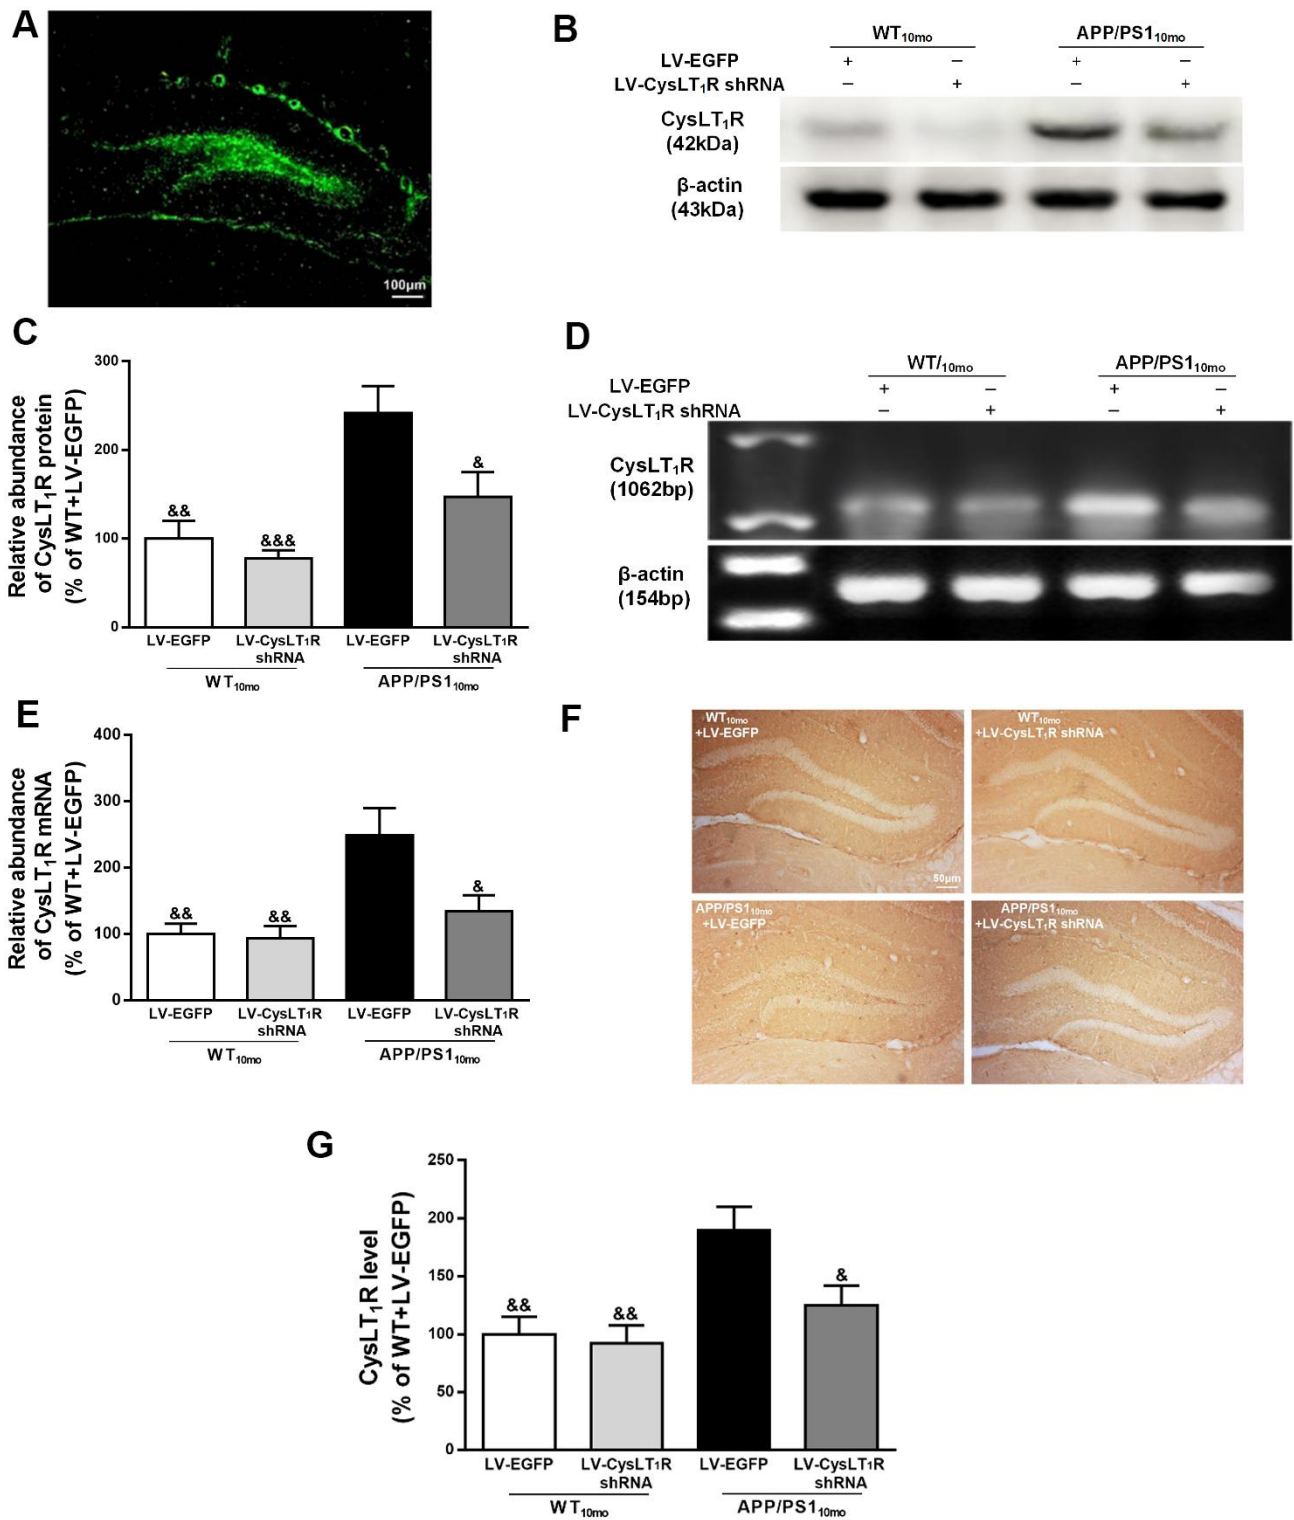

**Supplementary Figure 2. Hippocampal CysLT<sub>1</sub>R knockdown by injection with the LV-CysLT<sub>1</sub>R shRNA-EGFP.** (A) Shown is representative hippocampal DG with lentivirus transfection after 4 weeks. (B) WB detection of CysLT<sub>1</sub>R protein in the hippocampi of 10-month-old APP/PS1 mice injected with the LV-CysLT<sub>1</sub>R shRNA-EGFP or LV-EGFP bilaterally into the DG. (C) Quantification of CysLT<sub>1</sub>R protein level was expressed as the ratio (in %) of WT+LV-EGFP group. (D) RT-PCR detection of CysLT<sub>1</sub>R mRNA in the hippocampi of WT and APP/PS1 mice injected with the LV-CysLT<sub>1</sub>R shRNA-EGFP or LV-EGFP bilaterally into the DG. (E) Quantification of CysLT<sub>1</sub>R mRNA level was expressed as the ratio (in %) of WT+LV-EGFP group. (F) Immunohistochemical analyses of CysLT<sub>1</sub>R levels in the hippocampi of 10-month-old APP/PS1 mice injected with the LV-CysLT<sub>1</sub>R shRNA-EGFP or LV-EGFP bilaterally into the DG. Scale bar = 50 μm. (G) Quantification of CysLT<sub>1</sub>R in the brain sections of mice. All values are expressed as mean ± SEM, n = 4, &P<0.05, &&P<0.01, &&&P<0.001 vs. APP/PS1+LV-EGFP mice.

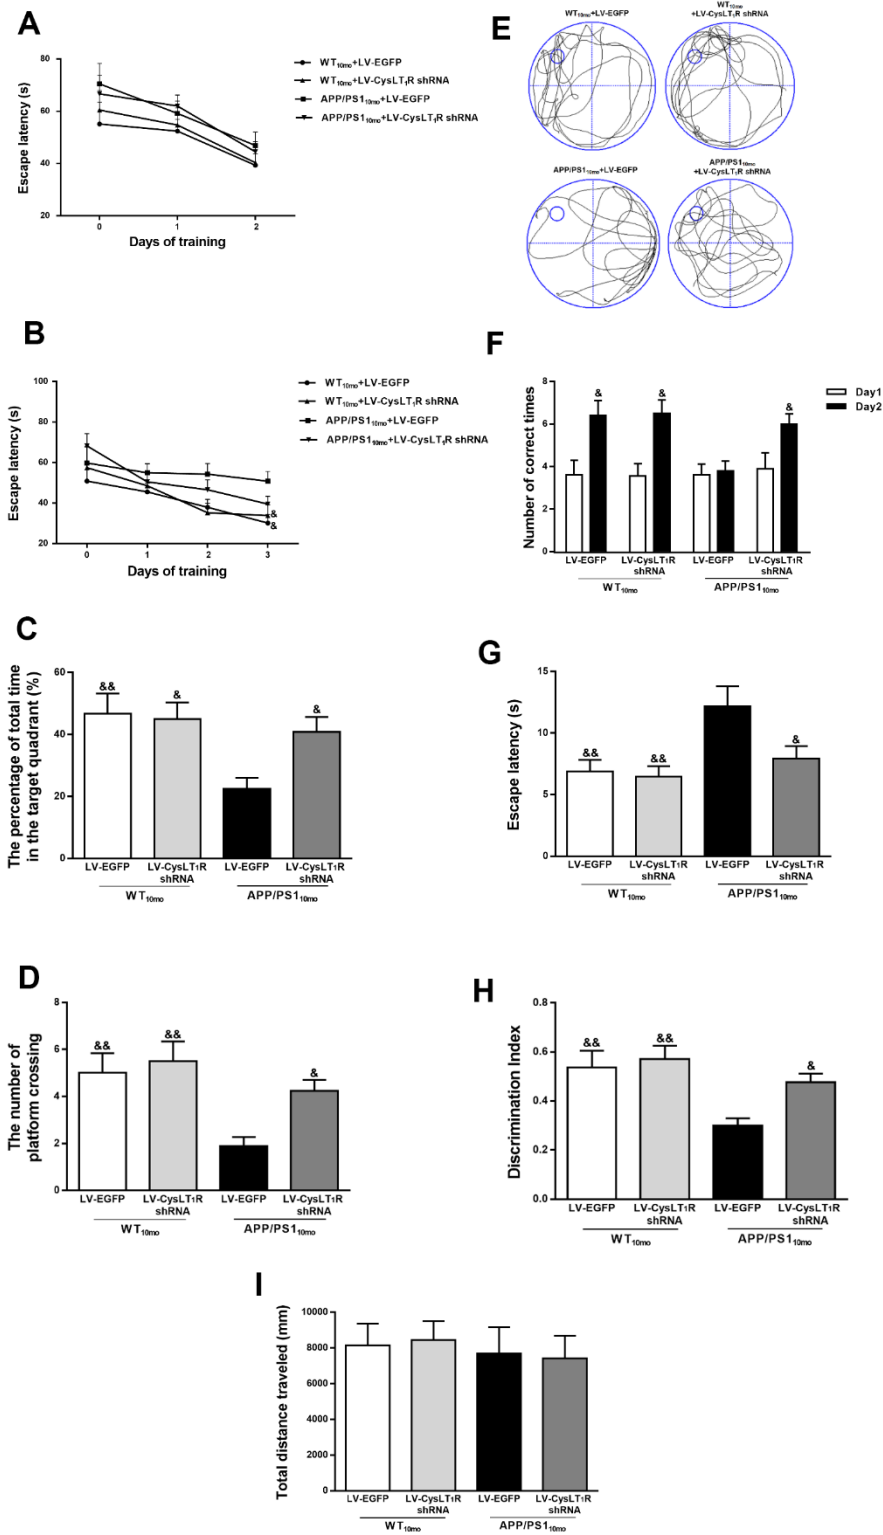

**Supplementary Figure 3. Hippocampal knockdown of CysLT<sub>1R</sub> improves cognitive decline in APP/PS1 mice.** In the MWM task, day 0 indicates performance in the first trial, and subsequent points represent average of all daily trials. **(A)** The mean escape latency to the visible platform **(B)** The mean escape latency to the hidden platform **(C)** The percentage of time spent in the target quadrant, and **(D)** numbers of platform location crossings during the probe trial test. **(E)** Representative swim paths of mice. In the Y-maze test, **(F)** the number of correct choices on days 1-2 and **(G)** the latency to enter the shock-free compartment on day 2. In NORT, **(H)** discrimination index shown by the time spent exploring the novel object compared to the familiar one. In open field test, **(I)** the total distance traveled was analyzed. All values are expressed as mean  $\pm$  SEM,  $n = 8$ ,  $*P < 0.05$ ,  $**P < 0.01$ ,  $***P < 0.001$  vs. APP/PS1+LV-EGFP mice.

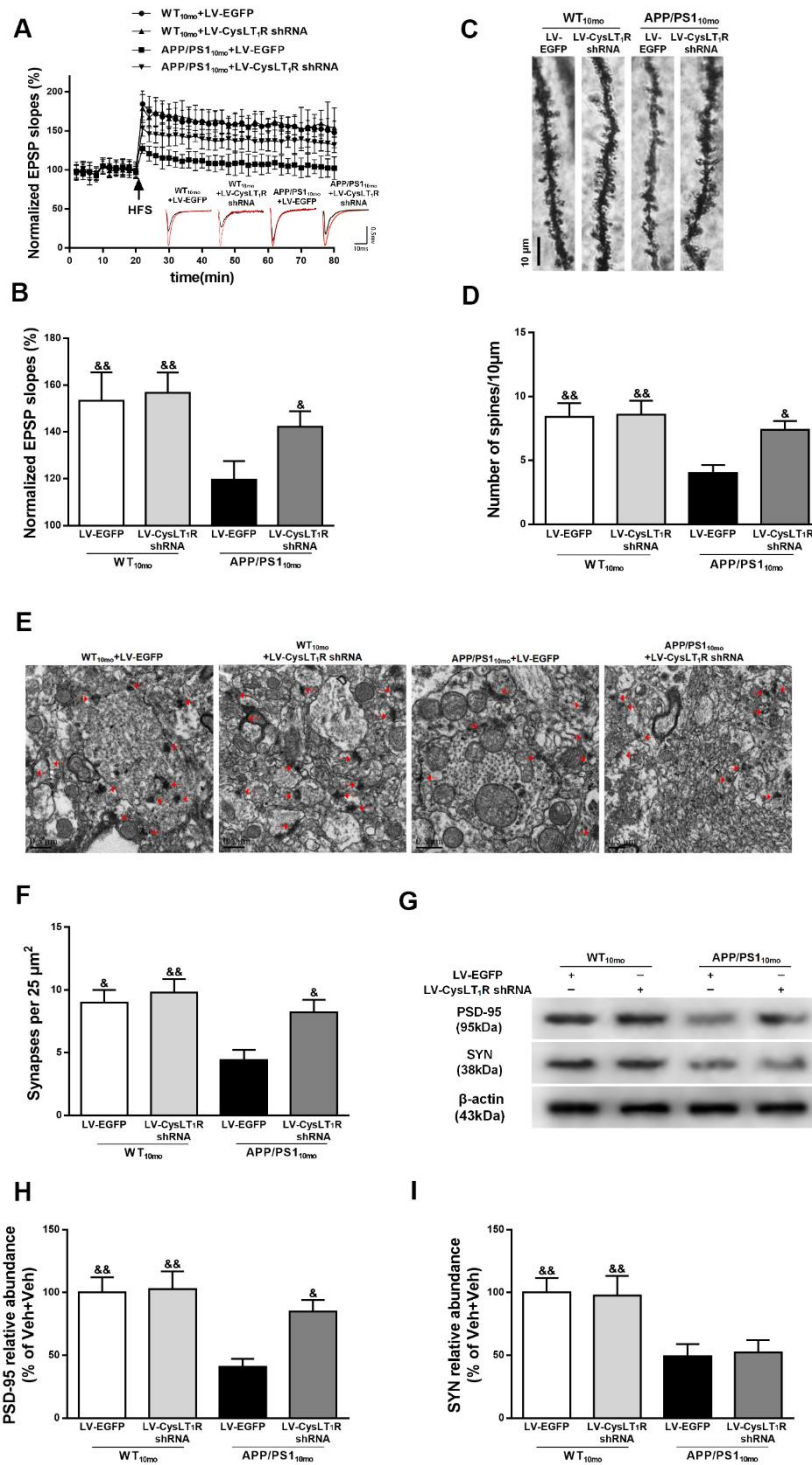

**Supplementary Figure 4. Hippocampal knockdown of CysLT<sub>1</sub>R improves hippocampal synaptic plasticity in APP/PS1 mice.** (A) The induction of hippocampal LTP was assessed after high-frequency stimulation (HFS; indicated as an arrow) and recorded for 60 min post-induction. (B) Summary bar-graphs showing differences in mean values of fEPSPs slope during 55-60 mins following the induction of LTP among genotypes. (C) Representative images of Golgi-impregnated dendrites in the hippocampi of 10-month-old APP/PS1 mice injected with the LV- CysLT<sub>1</sub>R shRNA-EGFP or LV-EGFP bilaterally into the DG. Scale bar = 10 μm. (D) Statistical analysis of the average number of dendritic spines. (E) The synaptic density in the hippocampus of WT and APP/PS1 mice injected with the LV- CysLT<sub>1</sub>R shRNA-EGFP or LV-EGFP bilaterally into the DG. Scale bar = 1 μm. (F) Statistical analysis of synaptic density calculated as the number of synapses per 25 μm<sup>2</sup>. (G) Representative immunoblots of PSD-95 and SYN in the hippocampi of 10-month-old APP/PS1 mice injected with the LV- CysLT<sub>1</sub>R shRNA-EGFP or LV-EGFP bilaterally into the DG. Quantification of (H) PSD-95 and (I) SYN protein levels were expressed as the ratio (in %) of WT+LV-EGFP group. All values are expressed as mean ± SEM, n = 4-5, &P<0.05, &&P<0.01, &&&P<0.001 vs. APP/PS1+LV-EGFP mice.

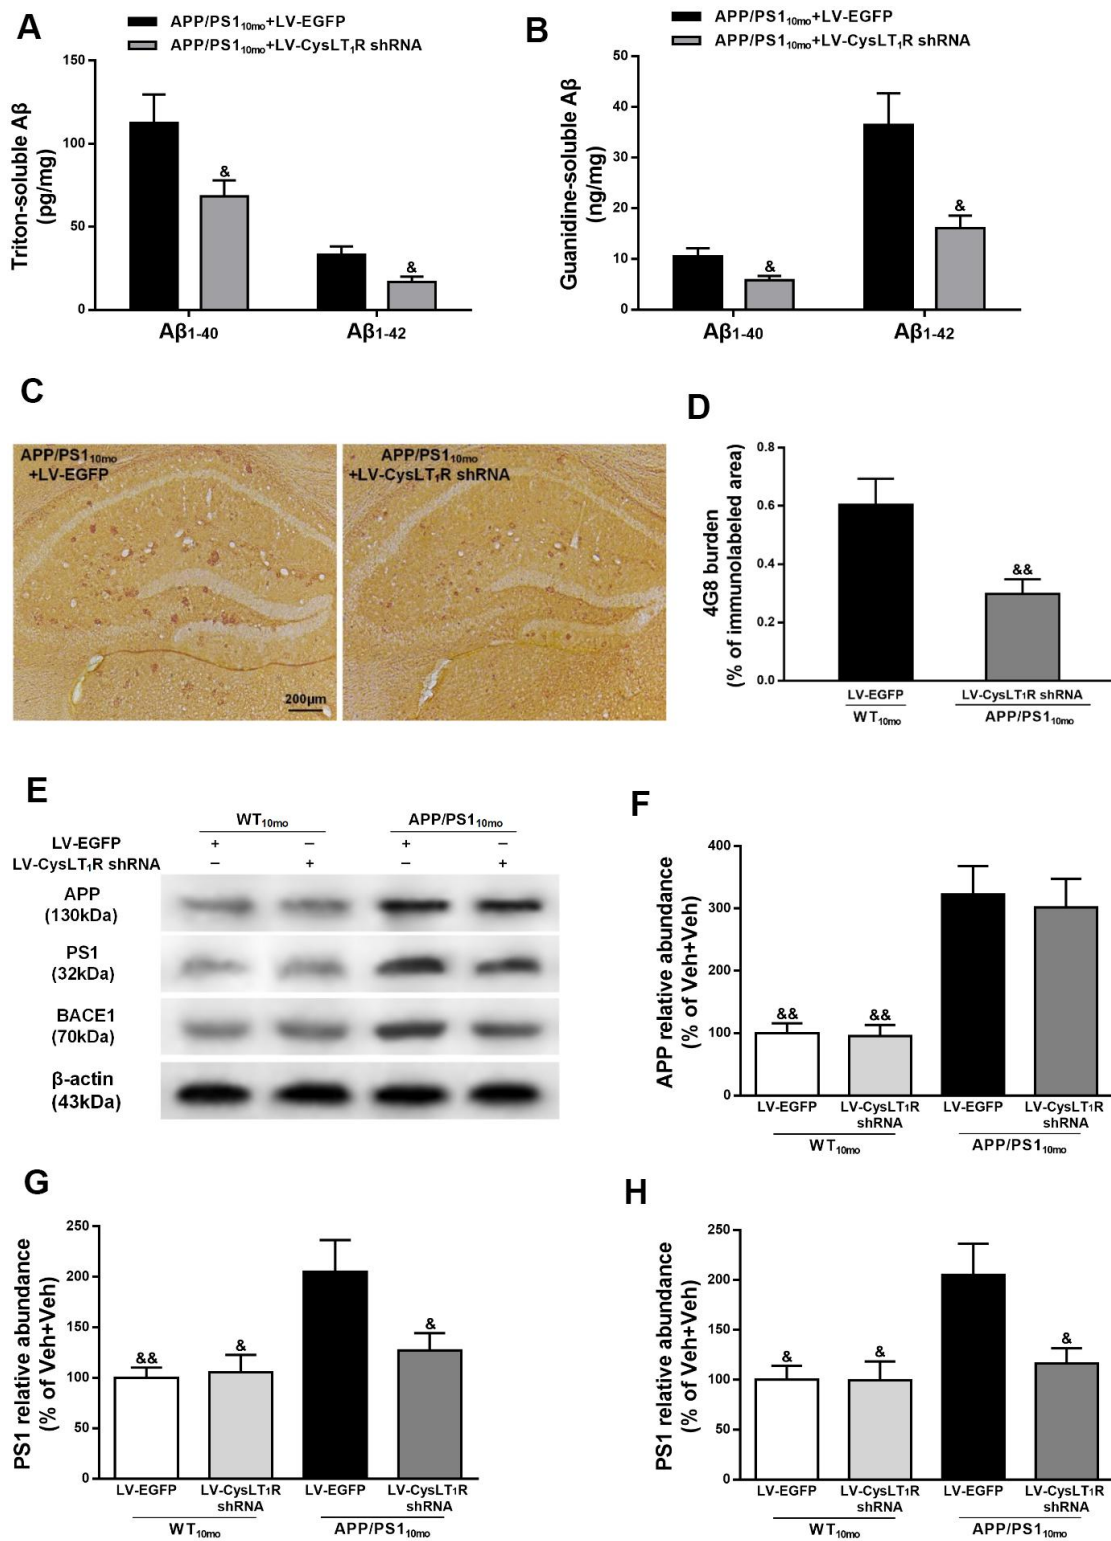

**Supplementary Figure 5. Hippocampal knockdown of CysLT<sub>1</sub>R inhibits amyloidogenesis in APP/PS1 mice.** The triton-soluble fractions (A) and the guanidine-soluble fractions (B) of Aβ<sub>1-40</sub> and Aβ<sub>1-42</sub> in the hippocampi of 10-month-old APP/PS1 mice injected with the LV-CysLT<sub>1</sub>R shRNA-EGFP or LV-EGFP bilaterally into the DG were assessed by ELISA. (C) Aβ immunostaining with 4G8 antibody in brain sections. Scale bar = 200 μm. (D) The percentage of area covered by Aβ deposition was quantified. (E) Representative immunoblots of APP, PS1 and BACE in the hippocampi of WT and APP/PS1 mice injected with the LV-CysLT<sub>1</sub>R shRNA-EGFP or LV-EGFP bilaterally into the DG. Quantifications of (F) APP, (G) PS1 and (H) BACE were expressed as the ratio (in %) of WT+LV-EGFP group. Values are mean ± SEM, n = 4-6, &P<0.05, &&P<0.01, &&&P<0.001 vs. APP/PS1+LV-EGFP mice.
